# Supplementary material
Source: Royal Society of Chemistry journal article supplement (doi:10.1039/d6cp00901h)
Supplement: d6cp00901h1.pdf [file d6cp00901h1.pdf]

## Electronic Supplementary Information

### Quasi-one-dimensional BiSeX (X = Br , I) semiconductors as promising thermoelectric materials with anisotropic transport properties

Yunping Yang, Kang Zhang, Hongkuan Yuan, Hong Chen\*

School of Physical Science and Technology, Southwest University, Chongqing 400715, China

\*Corresponding author. E-mail: [chenh@swu.edu.cn](mailto:chenh@swu.edu.cn)

#### 1. Intrinsic carrier concentration

Based on the Fermi-Dirac distribution and density of states (DOS), we calculated the intrinsic carrier concentration of the BiSeX (X = Br, I) with the following expressions:

$$n_0 = \int_{E_F}^{+\infty} \rho_c(E) f(E) dE, \quad (\text{S1})$$

$$\rho_0 = \int_{-\infty}^{E_F} \rho_v(E) [1 - f(E)] dE, \quad (\text{S2})$$

$$f(E) = \frac{1}{e^{\frac{E-E_F}{k_B T}} + 1}, \quad (\text{S3})$$

where  $E_F$  is the Fermi level,  $k_B$  is the Boltzmann constant,  $f(E)$  represents the electron occupation probability, and  $1 - f(E)$  corresponds to the hole occupation probability. Additionally,  $\rho_c(E)$  and  $\rho_v(E)$  denote the density of states (DOS) of the conduction and valence bands, respectively.

## 2. Convergence test on the lattice thermal conductivity

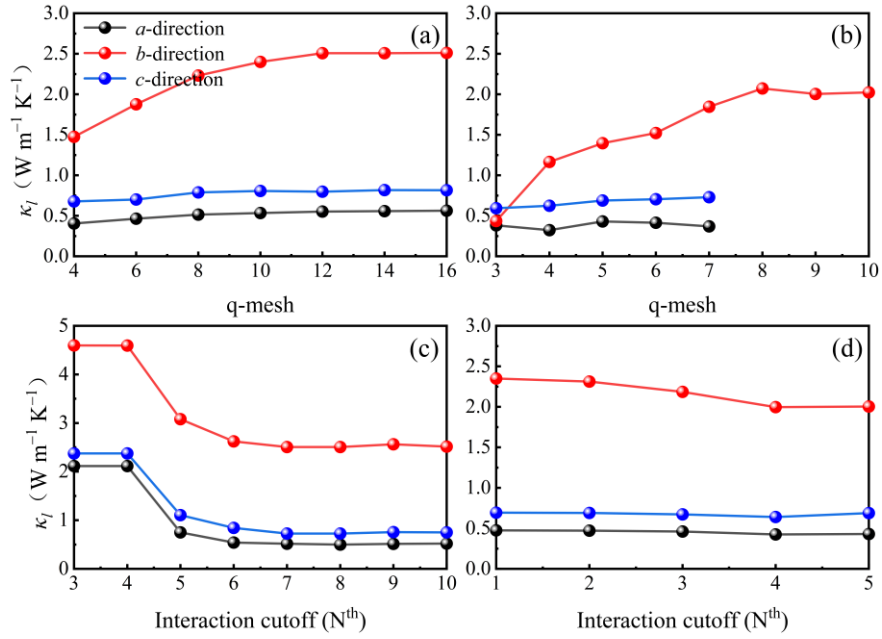

Fig. S1 Convergence tests for (a) the 3ph (b) 3+4ph q-mesh, and (c) and (d) cutoff values for the cubic and quartic force constant interactions in the thermal conductivity of BiSeI.

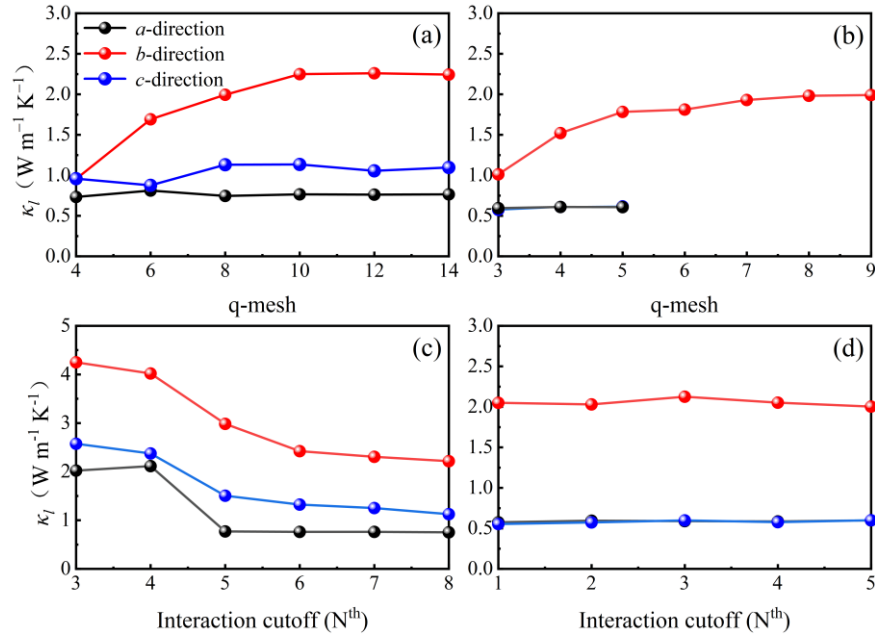

Fig. S2 Convergence tests for (a) the 3ph (b) 3+4ph q-mesh, and (c) and (d) cutoff values for the cubic and quartic force constant interactions in the thermal conductivity of BiSeBr

### 3. Convergence test of the phonon spectra with respect to the supercell size

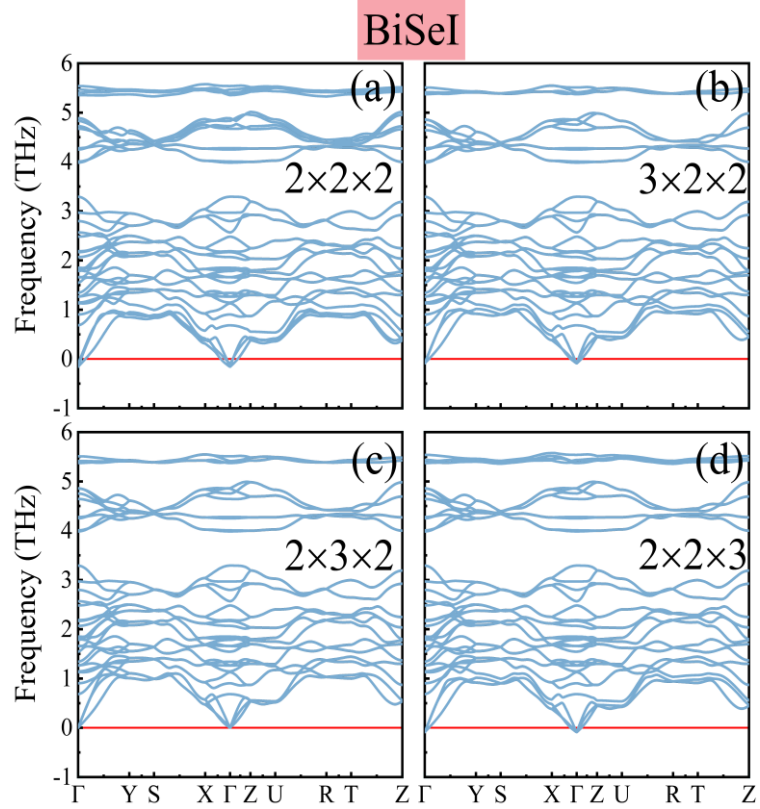

Fig S3 Convergence test of the phonon spectra with respect to supercell size of (a)  $2 \times 2 \times 2$ , (b)  $3 \times 2 \times 2$ , (c)  $2 \times 3 \times 2$ , and (d)  $2 \times 2 \times 3$  supercells for BiSeI.

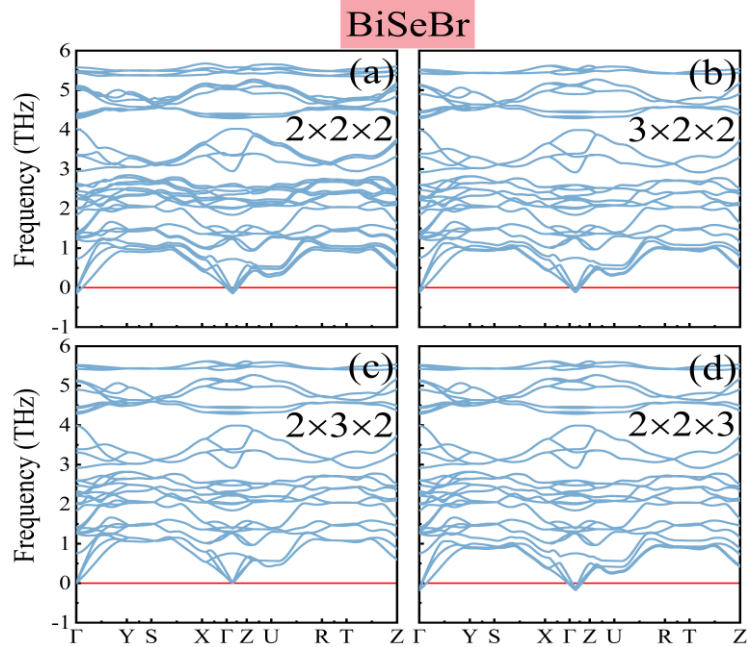

Fig. S4 Convergence test of the phonon spectra with respect to the supercell size (a)  $2 \times 2 \times 2$ , (b)  $3 \times 2 \times 2$ , (c)  $2 \times 3 \times 2$ , and (d)  $2 \times 2 \times 3$  supercells for BiSeBr.

#### 4. The *ab initio* molecular dynamics (AIMD) simulations

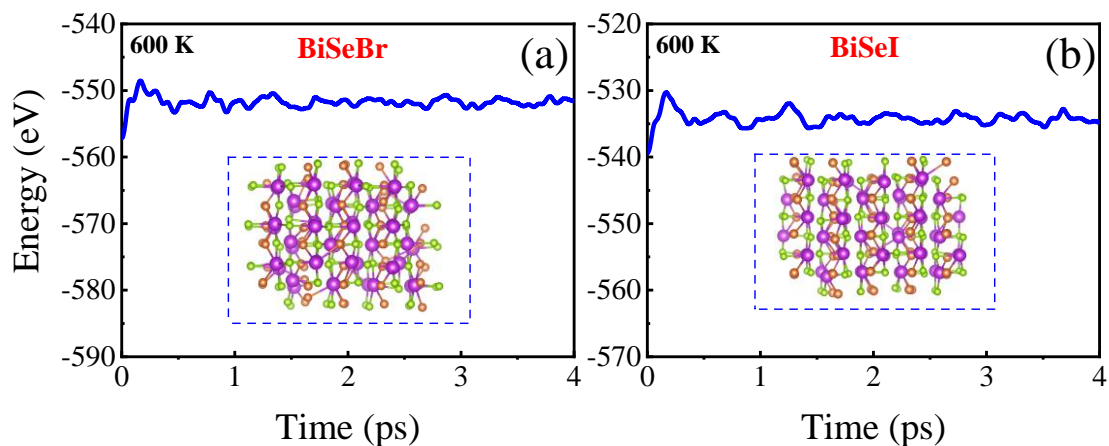

Fig. S5 The energy of the BiSeX (X = Br/I) by AIMD simulation at 600 K.

#### 5. Carrier mobility in intrinsic carrier concentrations

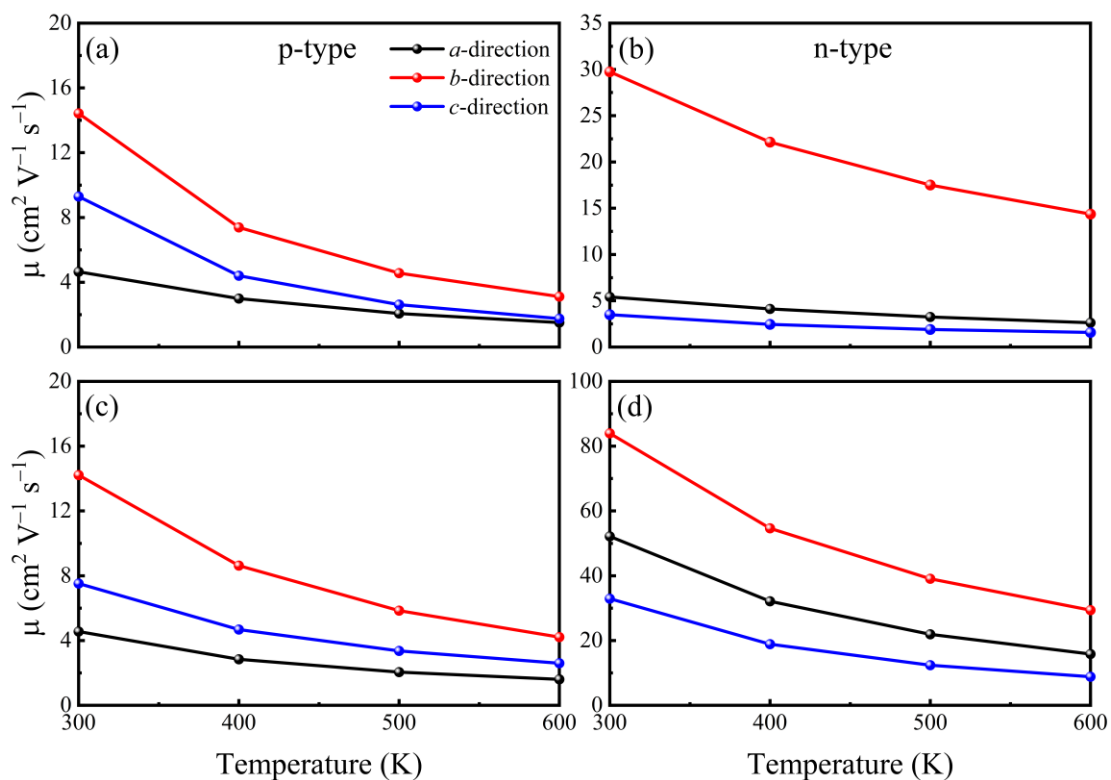

Fig. S6 Calculated temperature-dependent carrier mobility for p- and n-type BiSeI (a, b) and BiSeBr (c, d) in intrinsic carrier concentrations. Black, red, and blue lines indicate transport along the *a*-, *b*-, and *c*-axes, respectively.

## 6. Calculated Born effective charge tensors for the different atoms in BiSeI and BiSeBr.

Table S1 Born effective charge tensors  $Z_{\kappa}^*$  (in units of  $e$ ) for the different atoms in BiSeI and BiSeBr.

| Compound | Atom | Born effective charge tensor:<br>$Z_{\kappa}^* = \begin{pmatrix} Z_{xx}^* & Z_{xy}^* & Z_{xz}^* \\ Z_{yx}^* & Z_{yy}^* & Z_{yz}^* \\ Z_{zx}^* & Z_{zy}^* & Z_{zz}^* \end{pmatrix}$ |
|----------|------|------------------------------------------------------------------------------------------------------------------------------------------------------------------------------------|
| BiSeI    | Bi   | $\begin{pmatrix} 2.93 & 0 & -0.11 \\ 0 & 6.11 & 0 \\ -1.17 & 0 & 3.98 \end{pmatrix}$                                                                                               |
| BiSeI    | Se   | $\begin{pmatrix} -1.14 & 0 & -0.11 \\ 0 & -3.00 & 0 \\ 0.77 & 0 & -1.74 \end{pmatrix}$                                                                                             |
| BiSeI    | I    | $\begin{pmatrix} -1.79 & 0 & -0.80 \\ 0 & -3.11 & 0 \\ -1.13 & 0 & -2.23 \end{pmatrix}$                                                                                            |
| BiSeBr   | Bi   | $\begin{pmatrix} 2.16 & 0 & 0.10 \\ 0 & 5.72 & 0 \\ 0.89 & 0 & 3.35 \end{pmatrix}$                                                                                                 |
| BiSeBr   | Se   | $\begin{pmatrix} -0.72 & 0 & 0.10 \\ 0 & -2.65 & 0 \\ -0.58 & 0 & -1.39 \end{pmatrix}$                                                                                             |
| BiSeBr   | Br   | $\begin{pmatrix} -1.44 & 0 & -0.71 \\ 0 & -3.07 & 0 \\ -1.08 & 0 & -1.97 \end{pmatrix}$                                                                                            |

**7. Electrical transport properties and the dimensional less merit of figure (zT) of BiSeI under intrinsic carrier concentrations at different temperatures**

Table S2 Electrical transport parameters ( $\sigma$ ,  $S$ ,  $\kappa_e$ , and PF) and the dimensional less merit of figure (zT) of BiSeI under intrinsic carrier concentrations at different temperatures

| T(K)                                            | Direction | Type | 300 K                 | 400 K                 | 500 K                 | 600 K                 |
|-------------------------------------------------|-----------|------|-----------------------|-----------------------|-----------------------|-----------------------|
| Intrinsic carrier concentration                 |           | n    | $4.29 \times 10^{17}$ | $1.90 \times 10^{18}$ | $3.18 \times 10^{18}$ | $4.27 \times 10^{18}$ |
|                                                 |           | p    | $2.36 \times 10^{17}$ | $1.41 \times 10^{18}$ | $4.81 \times 10^{18}$ | $1.19 \times 10^{19}$ |
| $\sigma$ ( $\Omega^{-1} \text{ m}^{-1}$ )       | a         | n    | 37.28                 | 125.30                | 165.43                | 179.84                |
|                                                 |           | p    | 17.57                 | 67.55                 | 159.46                | 288.69                |
|                                                 | b         | n    | 204.49                | 673.86                | 892.18                | 982.24                |
|                                                 |           | p    | 54.55                 | 166.96                | 351.72                | 594.00                |
|                                                 | c         | n    | 24.06                 | 74.61                 | 96.83                 | 107.76                |
|                                                 |           | p    | 35.14                 | 99.53                 | 201.94                | 334.86                |
| s ( $\mu\text{V K}^{-1}$ )                      | a         | n    | -646.17               | -539.21               | -508.37               | -493.92               |
|                                                 |           | p    | 714.28                | 605.07                | 523.83                | 485.37                |
|                                                 | b         | n    | -633.55               | -535.36               | -511.12               | -501.08               |
|                                                 |           | p    | 631.46                | 550.59                | 502.31                | 473.31                |
|                                                 | c         | n    | -614.40               | -523.36               | -510.10               | -511.89               |
|                                                 |           | p    | 611.92                | 535.89                | 488.58                | 457.30                |
| $\kappa_e$ ( $\text{W m}^{-1} \text{ K}^{-1}$ ) | a         | n    | $1.66 \times 10^{-4}$ | $6.46 \times 10^{-4}$ | $9.57 \times 10^{-4}$ | $1.19 \times 10^{-3}$ |
|                                                 |           | p    | $9.41 \times 10^{-5}$ | $4.08 \times 10^{-4}$ | $1.24 \times 10^{-3}$ | $2.86 \times 10^{-3}$ |

|                          |   |   |                       |                       |                       |                       |
|--------------------------|---|---|-----------------------|-----------------------|-----------------------|-----------------------|
|                          | b | n | $9.84 \times 10^{-4}$ | $4.05 \times 10^{-3}$ | $6.26 \times 10^{-3}$ | $7.87 \times 10^{-3}$ |
|                          |   | p | $2.98 \times 10^{-4}$ | $1.33 \times 10^{-3}$ | $3.69 \times 10^{-3}$ | $8.25 \times 10^{-3}$ |
|                          | c | n | $1.10 \times 10^{-4}$ | $5.13 \times 10^{-4}$ | $9.07 \times 10^{-4}$ | $1.29 \times 10^{-3}$ |
|                          |   | p | $1.79 \times 10^{-4}$ | $7.75 \times 10^{-4}$ | $2.03 \times 10^{-3}$ | $6.24 \times 10^{-3}$ |
| PF ( $W m^{-1} K^{-2}$ ) | a | n | $1.56 \times 10^{-5}$ | $3.64 \times 10^{-5}$ | $4.28 \times 10^{-5}$ | $4.39 \times 10^{-5}$ |
|                          |   | p | $8.97 \times 10^{-6}$ | $2.47 \times 10^{-5}$ | $4.53 \times 10^{-5}$ | $6.80 \times 10^{-5}$ |
|                          | b | n | $8.21 \times 10^{-5}$ | $1.93 \times 10^{-4}$ | $2.33 \times 10^{-4}$ | $2.47 \times 10^{-4}$ |
|                          |   | p | $2.17 \times 10^{-5}$ | $5.06 \times 10^{-5}$ | $8.87 \times 10^{-5}$ | $1.33 \times 10^{-4}$ |
|                          | c | n | $9.08 \times 10^{-6}$ | $2.04 \times 10^{-5}$ | $2.52 \times 10^{-5}$ | $2.82 \times 10^{-5}$ |
|                          |   | p | $1.32 \times 10^{-5}$ | $2.86 \times 10^{-5}$ | $4.82 \times 10^{-5}$ | $7.00 \times 10^{-4}$ |
| zT                       | a | n | 0.010                 | 0.038                 | 0.070                 | 0.097                 |
|                          |   | p | 0.006                 | 0.026                 | 0.074                 | 0.149                 |
|                          | b | n | 0.012                 | 0.053                 | 0.103                 | 0.158                 |
|                          |   | p | 0.003                 | 0.014                 | 0.039                 | 0.085                 |
|                          | c | n | 0.004                 | 0.017                 | 0.033                 | 0.058                 |
|                          |   | p | 0.006                 | 0.024                 | 0.064                 | 0.141                 |

Table S3 Electrical transport parameters ( $\sigma$ ,  $S$ ,  $\kappa_e$ , and PF) and the dimensionless merit of figure ( $zT$ ) of BiSeBr under intrinsic carrier concentrations at different temperatures

| T(K)                                          | Direction | type | 300 K                 | 400 K                 | 500 K                 | 600 K                 |
|-----------------------------------------------|-----------|------|-----------------------|-----------------------|-----------------------|-----------------------|
| Intrinsic carrier concentration               |           | n    | $4.52 \times 10^{17}$ | $1.86 \times 10^{18}$ | $3.08 \times 10^{18}$ | $5.23 \times 10^{18}$ |
|                                               |           | p    | $2.38 \times 10^{17}$ | $1.36 \times 10^{18}$ | $4.51 \times 10^{18}$ | $1.11 \times 10^{19}$ |
| $\sigma$ ( $\Omega^{-1} \text{ m}^{-1}$ )     | a         | n    | 330.00                | 872.67                | 1025.59               | 1303.15               |
|                                               |           | p    | 35.34                 | 143.20                | 341.56                | 620.75                |
|                                               | b         | n    | 790.34                | 2191.28               | 2637.72               | 3385.32               |
|                                               |           | p    | 50.86                 | 182.15                | 417.71                | 760.56                |
|                                               | c         | n    | 143.46                | 495.03                | 704.63                | 1031.12               |
|                                               |           | p    | 47.94                 | 158.12                | 348.72                | 617.71                |
| $s$ ( $\mu\text{V K}^{-1}$ )                  | a         | n    | -488.17               | -412.40               | -406.65               | -393.87               |
|                                               |           | p    | 732.42.               | 609.67                | 527.98                | 470.45                |
|                                               | b         | n    | -499.44               | -421.45               | -411.65               | -392.87               |
|                                               |           | p    | 684.99                | 588.36                | 523.98                | 477.04                |
|                                               | c         | n    | -563.27               | -488.28               | -475.57               | -452.31               |
|                                               |           | p    | 655.98                | 570.71                | 510.59                | 464.43                |
| $\kappa_e$ ( $\text{m}^{-1} \text{ K}^{-1}$ ) | a         | n    | $1.66 \times 10^{-3}$ | $6.23 \times 10^{-3}$ | $9.66 \times 10^{-3}$ | $1.50 \times 10^{-2}$ |
|                                               |           | p    | $1.66 \times 10^{-4}$ | $7.34 \times 10^{-4}$ | $2.02 \times 10^{-3}$ | $4.53 \times 10^{-3}$ |
|                                               | b         | n    | $4.23 \times 10^{-3}$ | $1.57 \times 10^{-2}$ | $2.26 \times 10^{-2}$ | $3.24 \times 10^{-2}$ |
|                                               |           | p    | $2.97 \times 10^{-4}$ | $1.30 \times 10^{-4}$ | $3.53 \times 10^{-3}$ | $7.70 \times 10^{-3}$ |
|                                               | c         | n    | $1.07 \times 10^{-3}$ | $4.65 \times 10^{-3}$ | $7.44 \times 10^{-3}$ | $1.15 \times 10^{-3}$ |

|                                        |   |   |                       |                       |                       |                       |
|----------------------------------------|---|---|-----------------------|-----------------------|-----------------------|-----------------------|
|                                        |   | p | $2.87 \times 10^{-4}$ | $1.18 \times 10^{-3}$ | $2.92 \times 10^{-3}$ | $5.82 \times 10^{-3}$ |
| PF ( $\text{W m}^{-1} \text{K}^{-2}$ ) | a | n | $7.86 \times 10^{-5}$ | $1.48 \times 10^{-4}$ | $1.70 \times 10^{-4}$ | $2.02 \times 10^{-4}$ |
|                                        |   | p | $1.90 \times 10^{-5}$ | $5.32 \times 10^{-5}$ | $9.52 \times 10^{-5}$ | $1.37 \times 10^{-4}$ |
|                                        | b | n | $1.97 \times 10^{-4}$ | $3.89 \times 10^{-4}$ | $4.47 \times 10^{-4}$ | $5.23 \times 10^{-4}$ |
|                                        |   | p | $2.39 \times 10^{-5}$ | $6.31 \times 10^{-5}$ | $1.15 \times 10^{-4}$ | $1.73 \times 10^{-4}$ |
|                                        | c | n | $4.55 \times 10^{-4}$ | $1.18 \times 10^{-4}$ | $1.59 \times 10^{-4}$ | $2.11 \times 10^{-4}$ |
|                                        |   | p | $2.06 \times 10^{-5}$ | $5.15 \times 10^{-5}$ | $9.09 \times 10^{-5}$ | $1.33 \times 10^{-4}$ |
| zT                                     | a | n | 0.040                 | 0.123                 | 0.234                 | 0.354                 |
|                                        |   | p | 0.010                 | 0.045                 | 0.134                 | 0.248                 |
|                                        | b | n | 0.029                 | 0.102                 | 0.182                 | 0.300                 |
|                                        |   | p | 0.004                 | 0.017                 | 0.047                 | 0.102                 |
|                                        | c | n | 0.024                 | 0.108                 | 0.277                 | 0.382                 |
|                                        |   | p | 0.011                 | 0.048                 | 0.131                 | 0.245                 |
